# Supplementary material for: Differential expression of GPR15 on T cells during ulcerative colitis
Source: JCI journal article supplement (doi:10.1172/jci.insight.90585), 2017-04-19
Supplement: sd1 [file 1]

## Suppl. Figure 1

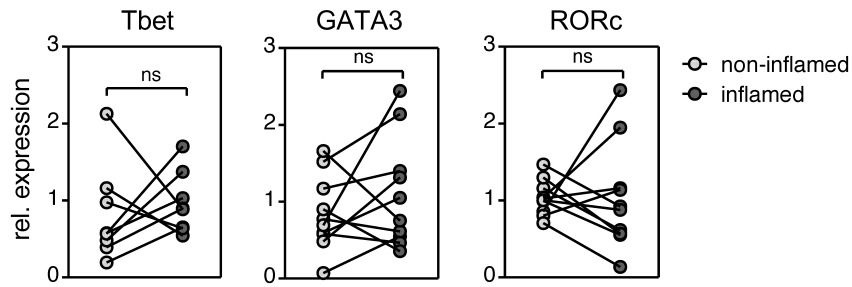

**Suppl. Figure 1.** No differences in the expression of transcriptionfactors Tbet, GATA3 and RORc in colon biopsies of UC patients. Tbet ,GATA3, and RORc in the colonic tissue was determined by quantitative real-time PCR. n = 8-10. Statistical analysis was performed by Student's t-test (\* $p < 0.05$ ; \*\* $p < 0.01$ ; \*\*\* $p < 0.001$ ).

## Suppl. Figure 2

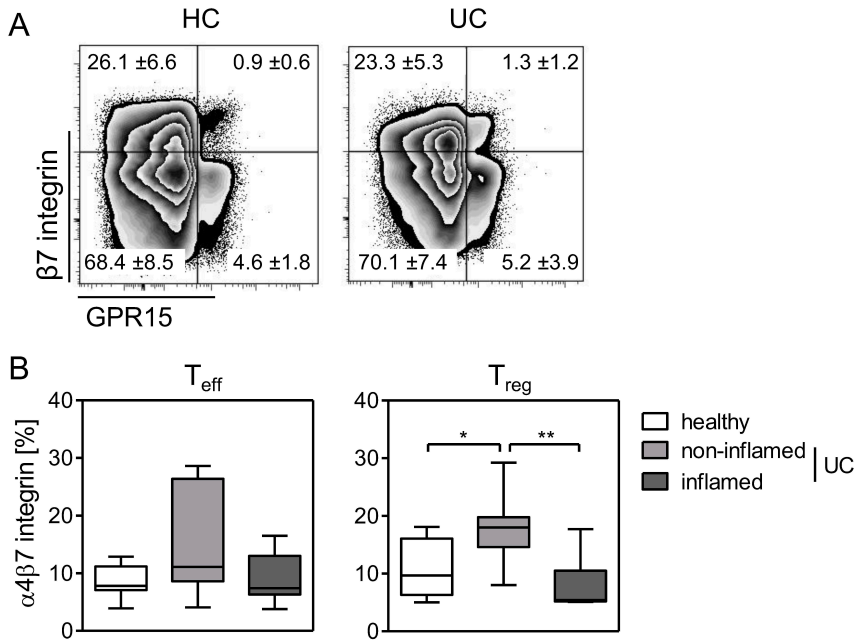

**Suppl. Figure 2.** Expression of  $\alpha$ 4 $\beta$ 7 integrin and GPR15 on CD4<sup>+</sup> T cells in UC patients. (A) PBMCs from healthy control donors (HC) and from ulcerative colitis patients (UC) were stained for co-expression of  $\beta$ 7 integrin and GPR15 on CD4<sup>+</sup> T cells. Representative plots are shown for each cell population with mean expression  $\pm$  SD for n = 8. Statistical analysis was performed by Student's t-test (\*p<0.05; \*\*p<0.01; \*\*\*p<0.001). (B) Colonic biopsies were taken from healthy individuals and from macroscopically inflamed and non-inflamed tissue of UC patients. Lymphocytes were isolated from the colonic tissue and stained for expression of  $\alpha$ 4 $\beta$ 7 integrin on FoxP3<sup>+</sup> ( $T_{\text{regs}}$ ) and FoxP3<sup>-</sup> ( $T_{\text{eff}}$ ) CD4<sup>+</sup> T cells.  $\alpha$ 4 $\beta$ 7 integrin expression is demonstrated as median (horizontal lines), 25th to 75th percentile (extension of boxes), and range (error bars), n = 7-8. Statistical analysis was performed by 1-way ANOVA followed by Tukey's post-hoc multiple comparison test.
